# Climate-risk to European fisheries and coastal communities

Mark R. Payne<sup>1\*</sup>, Manja Kudahl<sup>1</sup>, Georg H. Engelhard<sup>2,3</sup>, Myron A. Peck<sup>4,\*\*</sup> and John K. Pinnegar<sup>2,3</sup>

1. National Institute of Aquatic Resources (DTU-Aqua), Technical University of Denmark, 2800 Kgs. Lyngby, Denmark.
2. Centre for Environment, Fisheries & Aquaculture Science (Cefas), Pakefield Road, Lowestoft, United Kingdom
3. School of Environmental Sciences, University of East Anglia (UEA), Norwich, United Kingdom
4. Institute of Marine Ecosystem and Fisheries Science, Center for Earth System Research and Sustainability, University of Hamburg, Hamburg, Germany

\*Corresponding author.

Mark R. Payne  
National Institute of Aquatic Resources (DTU-Aqua)  
Technical University of Denmark  
2800 Kgs. Lyngby  
Denmark  
Tel.: +45 3396 3455  
ORCID: 0000-0001-5795-2481  
E-mail address: [mpay@aqu.dtu.dk](mailto:mpay@aqu.dtu.dk)

\*\*Present Address: Royal Netherlands Institute for Sea Research, PO Box 59, 1790 AB Den Burg, Texel, The Netherlands

**Keywords:** hazard, exposure, vulnerability, risk, climate change, fleets

## 30 **Abstract**

31 **With the majority of the global human population living in coastal regions, identifying the climate**  
32 **risk that ocean-dependent communities and businesses are exposed to is key to prioritising the finite**  
33 **resources available to support adaptation. Here we apply a climate-risk analysis across the European**  
34 **fisheries sector for the first time to identify the most at-risk fleets and sub-national regions. We**  
35 **combine a trait-based approach with ecological niche models to differentiate climate hazards between**  
36 **populations of fish and use them to assess the relative climate risk for 380 fishing fleets and 105**  
37 **coastal regions in Europe. Countries in SE Europe and the UK have the highest risks to both their**  
38 **fishing fleets and their communities while, in other countries, the risk-profile is greatest at either the**  
39 **fleet or community level. These results reveal the diversity of challenges posed by climate-change to**  
40 **European fisheries: climate adaptation, therefore, needs to be tailored to each country's and even**  
41 **each region's specific situation. Our analysis supports this process by highlighting where adaptation**  
42 **measures are needed and could have the greatest impact.**

## 43 Manuscript Body

44 The ocean provides human societies with a wide variety of goods and services, ranging from food and  
45 employment to climate regulation and cultural nourishment<sup>1</sup>. Climate change is already shifting the  
46 abundance, distribution, productivity and phenology of living marine resources<sup>2-4</sup> and, thereby, many of  
47 the ecosystem services that we depend upon<sup>5</sup>. These impacts, however, are not being experienced uniformly  
48 by human society but depend on the characteristics and context of the community or business affected.  
49 Raising awareness and understanding the risk to human systems is, therefore, a key first step<sup>6</sup> to developing  
50 and prioritising appropriate adaptation options in response to the challenges of the climate crisis<sup>7</sup>.

51 Over the past decades, climate risk assessments (CRAs) and climate vulnerability assessments (CVAs) have  
52 been developed to support such a prioritisation. The approach, developed by the Intergovernmental Panel  
53 on Climate Change (IPCC), has shifted over time from a focus on “vulnerability” to a focus on “risk”<sup>8</sup>, in  
54 part due to criticisms of the negative framing that “vulnerability” implies<sup>9</sup>. The modern CRA framework  
55 considers risk as the intersection of hazard, exposure and vulnerability<sup>10</sup>. CVAs, and more recently CRAs,  
56 have been applied widely in the marine realm, for example in coastal communities in northern Vietnam<sup>11</sup>,  
57 Kenya<sup>12</sup> and the USA<sup>13</sup>, at the national level across coastal areas of the USA<sup>14,15</sup> and Australia<sup>16,17</sup>, across  
58 regions such as Pacific island nations<sup>18,19</sup> and globally<sup>6,20,21</sup>. Several ‘best practice’ guides have also been  
59 developed<sup>7,22</sup>.

60 CRAs and CVAs covering European waters, however, are notable by their absence. The lack of attention  
61 to climate risk in European fisheries may arise in part from the results of early global CVAs<sup>6</sup> that ranked  
62 European countries as having low vulnerabilities due to their affluence and, therefore, high ‘adaptive  
63 capacity’. Yet the European region poses unique challenges when assessing climate-risks due to its wide  
64 range of species, biogeographical zones and habitats. Fishing techniques and the scale of fisheries vary  
65 widely, from large fleets of small vessels in the Mediterranean Sea<sup>23</sup> to some of the largest fishing vessels  
66 in the world (e.g. the 144-m long *Annelies Ilena*). Furthermore, although fisheries contribute very little to  
67 national GDP, food or income-security for most countries<sup>24</sup>, in specific communities and regions fishing is  
68 the mainstay of employment<sup>25</sup>. Adapting European fisheries to a changing climate, therefore, requires the  
69 development of robust analyses capable of assessing the climate-risk across this extremely diverse  
70 continent.

71 We conducted a detailed CRA across the European marine fisheries sector, estimating the climate risk of  
72 both fishing fleets and coastal regions in one integrated analysis. Our analyses span more than 50 degrees  
73 of latitude from the Black Sea to the Arctic and encompass the United Kingdom, Norway, Iceland and  
74 Turkey in addition to the 22 coastal nations of the European Union. We apply an approach that incorporates  
75 fine-scale geographical differences in the climate hazard of fish and shellfish populations and then assess  
76 the climate-risk of both European fishing fleets and coastal regions in two separate CRAs. Since both CRAs  
77 are based on the same underlying climate hazard, these analyses can be combined to compare the relative  
78 importance of climate-hazard to fleets and coastal communities within a country.

79 Our index of climate hazard is derived from the biological traits of the species being harvested, together  
80 with modelled distribution data. Species trait data were gathered for 157 fish and shellfish species harvested  
81 in European waters, representing 90.3% of the total value of landings in Europe and at least 78% (and  
82 typically more than 90%) of national value. We accounted for the expected large differences in climate  
83 hazard throughout a species range (i.e. from the cold to warm edges of the distribution) by focusing on  
84 “populations” (i.e. a single species in a single FAO subarea). Population-level climate hazards were then  
85 defined based on the thermal-safety margin (TSM) between the temperature in that subregion and the upper  
86 thermal tolerance of the species<sup>26,27</sup>. Climate hazards could then be calculated for 556 significant

87 “populations” in 23 FAO subareas, based on the TSM of the population and the inherent traits of the  
88 species<sup>15,28,29</sup>.

89 We then calculated the climate risk for 105 coastal regions across 26 countries in the European region  
90 (Figure 1). Population-level climate hazards of fish were integrated to regions, weighted by the relative  
91 value of landings in that region. We defined exposure metrics based on the diversity<sup>30,31</sup> of these landings,  
92 and vulnerability based on regional socio-economic metrics<sup>6</sup>. We focused our analysis on coastal regions,  
93 as these are the communities most directly dependent on the ocean: regions far from the sea but within a  
94 coastal nation were explicitly excluded (e.g. Bavaria in Germany).

95 The analysis reveals appreciable variation in the climate risk within the European region and even within a  
96 single country. In the United Kingdom, for example, climate risk is greatest in the north of England, while  
97 Scotland and the south of England show the least risk. Indeed, six of the 10 regions with the highest climate  
98 risk, including the overall top region (Tees Valley & Durham), are part of the UK (Table S8). These results  
99 reflect high hazard scores for the species landed in these regions, together with high vulnerability due to  
100 low GDP per capita in some of these regions.

101 Larger-scale patterns are also apparent. South-east Europe stands out with consistently high climate risk,  
102 with coastal Romania and Croatia in the top five. Both countries have high vulnerability scores due to low  
103 GDP per capita of their coastal communities, and high exposure scores due to fisheries that target only a  
104 few species (e.g. the value of Romania’s fisheries is more than 70% veined rapa whelk, *Rapana venosa*).  
105 Many northern European countries, including Belgium, the Netherlands and Scandinavian nations have  
106 relatively low climate risks due to their wealth (high GDP per capita), diverse fisheries and the relatively  
107 low climate hazard of the fish populations landed.

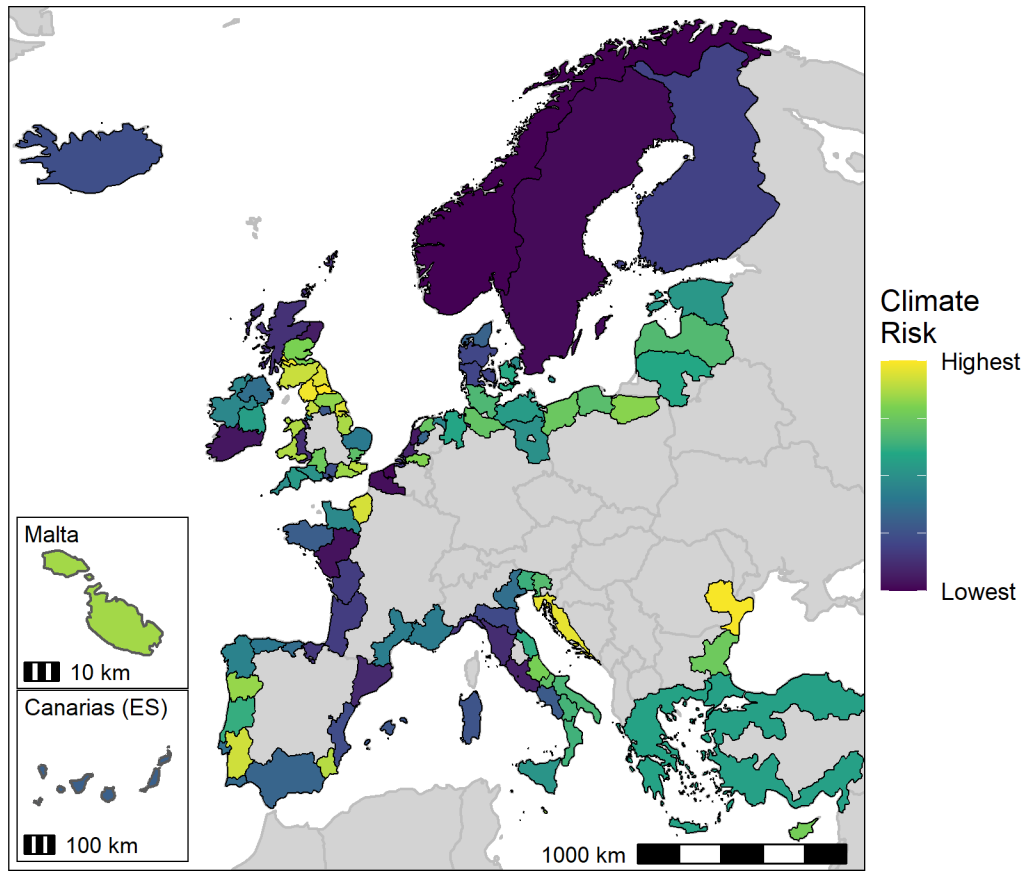

108  
109 **Figure 1 Map of the regional climate risk.** Colour scale is linear in the value of the corresponding score, but is presented without  
110 values, as they have little direct meaning. National-level borders are shown for reference. Insets at bottom-left show small regions.

111 The risks associated with climate change will also be felt by the individual fishing vessels and fleets whose  
112 fishers' livelihoods depend on the ocean. We therefore performed a second CRA to examine the climate  
113 risk of European fishing fleets. As the basis for this analysis, we followed the EU definition of a "fleet  
114 segment" based on the size classes of the vessels, the country of registration, the gear being used and the  
115 geographical region being fished (Atlantic or Mediterranean)<sup>23</sup>. We scaled fish population-level climate  
116 hazards up to the fleet segment level based on the composition of landings by value of that fleet, while we  
117 based exposure on the diversity and dominance of landings and vulnerability on the profitability of the fleet.  
118 Coverage of our analysis at this fleet segment level was poorer than at the national level: nevertheless, we  
119 still cover 75% or more of total fishery catch value for more than 70% of the 380 fleet segments within the  
120 EU and UK.

121 The smallest class of vessels (0-6m) had an appreciably higher climate risk than all other size classes (Figure  
122 2a). For the most part, these fleets operated in the Mediterranean region, particularly in Croatia, Bulgaria,  
123 France, Malta and Greece (Table S9). This result reflects, in part, the higher climate risk of stocks in this  
124 area, but is also driven by the poor profitability (and therefore higher vulnerability) of these fleets. On the  
125 other hand, the high catch diversity of these fleets reduces exposure and helps to reduce the net climate-  
126 risk.

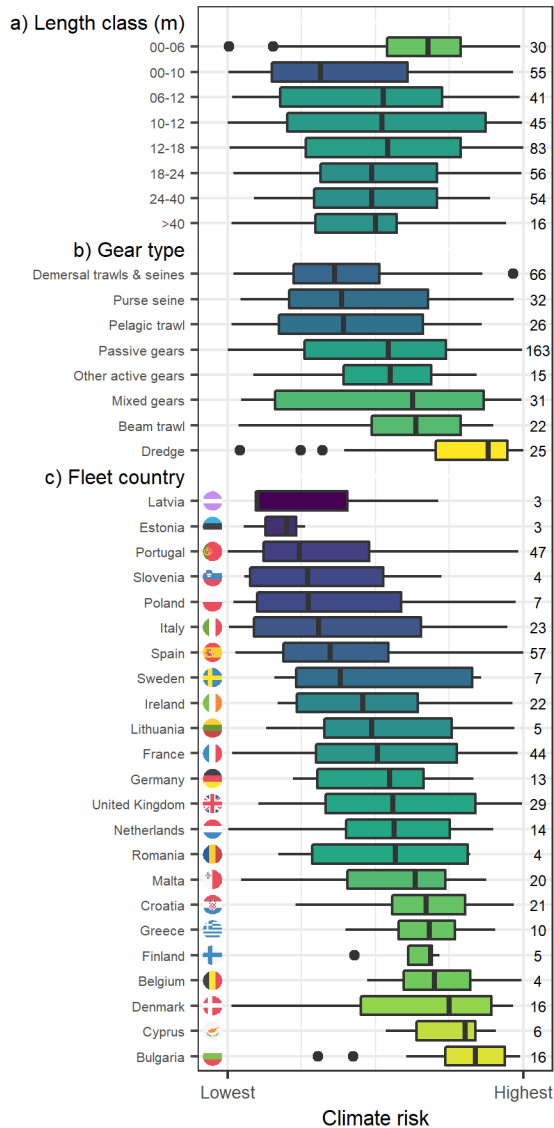

127

128 **Figure 2 Climate risk of European fleet segments.** The climate risk across 380 fleet segments is plotted as a function of a) the  
 129 size range of the vessels (m), b) the gear type employed (sorted by median risk) and c) the country of origin of the fleet (sorted by  
 130 median risk). Risk is represented on a linear scale from highest to lowest: the absolute values are not shown, as they have little  
 131 direct meaning. The distribution of risk is shown as a boxplot, where the vertical line is the median, the box corresponds to the  
 132 interquartile range (IQR), and the whiskers cover all points less than 1.5 times the IQR from the box. Outliers are plotted as points.  
 133 Boxes are coloured based on the median climate risk for that category. The number of fleet segments in each class is shown at right.  
 134 Note that the STECF definitions of small length classes (less than 12m) vary between countries and therefore have a degree of  
 135 overlap. STECF gear codes are aggregated to our “Gear Types” to ensure comparability between Atlantic and Mediterranean  
 136 fisheries (Table S4).

137 Systematic differences in climate-risk were revealed among gear types (Figure 2b), with dredgers having  
 138 the highest climate risk. These fleets generally target populations with high climate hazards and have low  
 139 species diversity in their catches (giving high exposure): good profitability, on the other hand, lowers their  
 140 vulnerability and somewhat reduces overall risk (Table S9). Fleets using pelagic and demersal trawls  
 141 together with purse seines have the lowest climate risks, primarily due to the low hazard associated with  
 142 the species on which they fish.

143 The strongest differentiation in climate risk amongst fleet segments, however, is at the national level (Figure  
144 2c). A clear cluster of high climate-risk fleet segments can be seen in south-east Europe, particularly in  
145 Croatia, Greece, Bulgaria, Cyprus and Romania (Figure S1). The risk profiles underlying each of these  
146 cases, however, are quite different, emphasising the need to understand the components in detail. Greek  
147 and Cypriot fleets have high climate risks due to poor profitability and, therefore, high vulnerability, while  
148 Bulgarian and Romanian fleets active in the Black Sea have extremely low catch diversities, giving them  
149 unusually high exposures (Table S9). It is also important to note that there is substantial variation among  
150 fleets within a country. For example, two of the five most at-risk fleets (including the most at risk) are  
151 Spanish (Table S9), even though the national level median for Spain is amongst the lowest in Europe. A  
152 detailed examination of the individual elements of the risk-profile is therefore critical to understanding the  
153 underlying factors responsible for these results.

154 A strength of the analysis performed here is that the results of the fleet and region CRAs can be directly  
155 compared. While the fleets and regions are all exposed to the same base set of hazards, the relative  
156 importance of each fish or shellfish population (and therefore hazard) differs. Each region and fleet also  
157 has its own intrinsic exposure and vulnerability profiles, further modulating the climate risk. However, as  
158 the base set of hazards that our analysis starts from is the same in both CRAs, a direct comparison of the  
159 two cases is possible, allowing the relative importance of climate risk to fleets and regions to be gauged.

160 Systematic differences in risk between fleets and regions can be seen among European countries (Figure 3)  
161 with several characteristic types of responses apparent. Countries in south-eastern Europe, together with  
162 the United Kingdom, have consistently the highest risk across both fleets and regions. The regional climate  
163 risk scores of states on the south coast of the Baltic (Latvia, Lithuania, Estonia and Poland) are higher than  
164 their fleet level scores, while the high fleet-risk of NW European states is moderated by their relative  
165 affluence and therefore low regional risk. Spain and Sweden generally have low climate risks in both  
166 sectors.

167

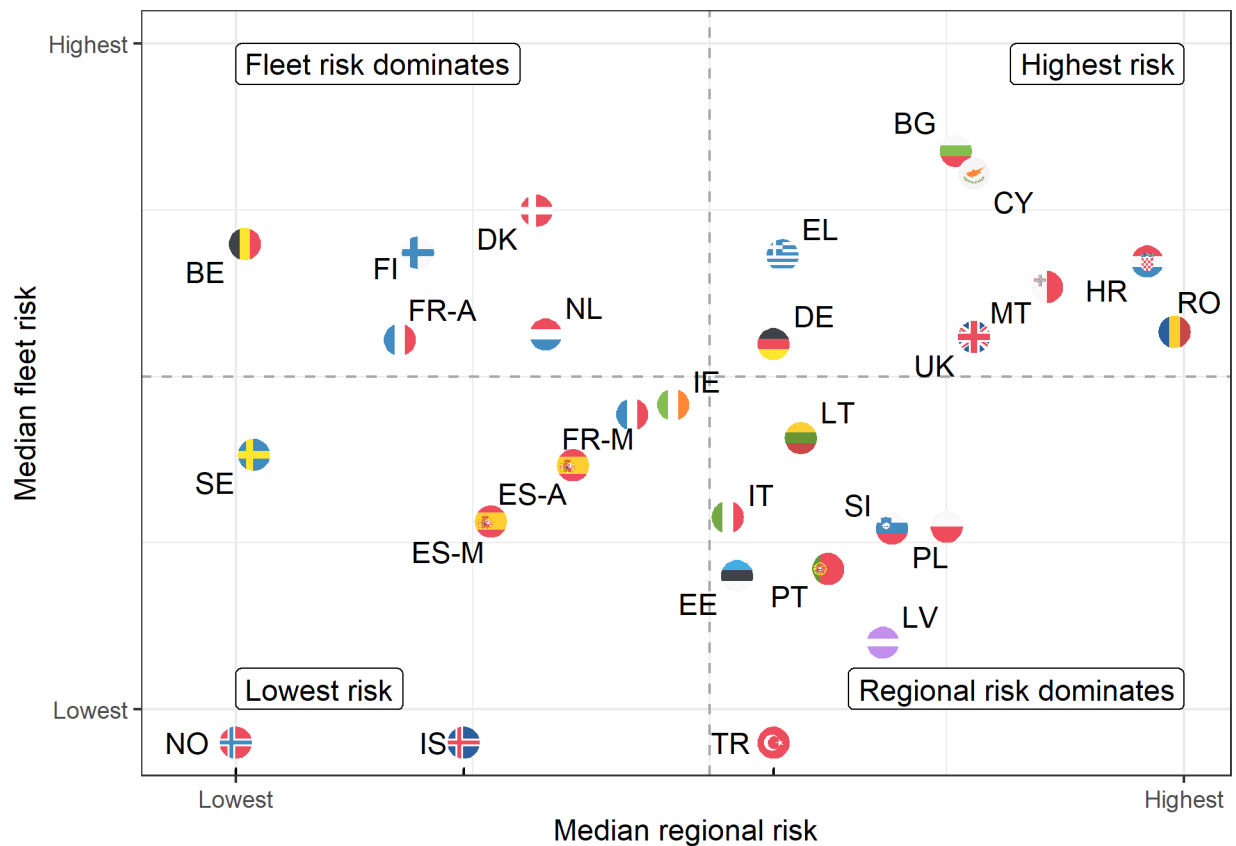

168

169 **Figure 3 Comparison of the median fleet- and region-based risks for European countries.** Labels indicate the country code.  
 170 In addition, France (FR) and Spain (ES) are split into their Atlantic (-A suffix) and Mediterranean (-M suffix) seabords. As the  
 171 fleet-segment analysis only covers fleets from the EU and UK, no data are available for Turkey, Norway and Iceland: their regional  
 172 risk results are plotted in the horizontal margin. Dashed lines divide the coordinate system into quarters. Country codes: BE:  
 173 Belgium. BG: Bulgaria. CY: Cyprus. DE: Germany. DK: Denmark. EE: Estonia. EL: Greece. ES: Spain. FI: Finland. FR: France.  
 174 HR: Croatia. IE: Ireland. IS: Iceland. IT: Italy. LT: Lithuania. LV: Latvia. MT: Malta. NL: Netherlands. NO: Norway. PL: Poland.  
 175 PT: Portugal. RO: Romania. SE: Sweden. SI: Slovenia. TR: Turkey. UK: United Kingdom.

176 Our analysis highlights the wide variety of challenges facing European countries and regions with adapting  
 177 their fisheries sectors to a changing climate. In some cases, such as in the southern-Baltic states, a focus on  
 178 strengthening the resilience of local regions and communities would be of most benefit e.g. by creating  
 179 alternative employment opportunities. In other regions, fleet risks dominate, and therefore increasing the  
 180 efficiency and diversity of the fleet would appear to be a priority. However, some areas, such as the UK  
 181 and south-east Europe appear to require both types of intervention, and therefore present the greatest  
 182 adaptation challenges. There is, however, no “one-size-fits-all” solution that can be applied across all  
 183 European waters or even, in some cases, across a country (e.g. the UK): climate adaptation plans therefore  
 184 need to be tailored to these realities.

185 Climate risk and vulnerability analyses do, however, have a key role to play in shaping the development of  
 186 such plans. By increasing awareness of the elements that contribute to a fleet or region’s risk<sup>6</sup>, CVAs and  
 187 CRAs can help prioritise adaptation actions to mitigate this risk<sup>32</sup> and thereby maximise the effectiveness  
 188 of limited resources. Previous socio-economic linked analyses have focused on adaptive capacity (in the  
 189 CVA framework) as a focal point for action<sup>6,12</sup>. However, the diversity of European risk profiles found here  
 190 highlights the need and potential for adaptation actions across all components of the risk portfolio.



191 First and foremost of these actions is ensuring sustainable management of the living marine resources upon  
192 which the sector rests. The future impact of over-exploitation of these resources can be more important than  
193 that stemming from climate change, particularly in the heavily fished North Atlantic region<sup>33</sup>. Maintaining  
194 these stocks at a higher abundance leads to increases in genetic diversity, meta-population complexity, and  
195 age structure, all of which make stocks more resilient to the challenges of a changing environment<sup>34,35</sup>. The  
196 ensuing increase in productivity and incomes will simultaneously benefit both fishing fleets and regions,  
197 generating a “win-win” effect<sup>36</sup>. Fisheries scientists already have many of the tools necessary to ensure that  
198 management systems are robust to climate change and climate variability<sup>37</sup>, while emerging tools, such as  
199 seasonal-to-decadal marine ecological forecasts<sup>38</sup>, can potentially provide the basis for further coping  
200 strategies<sup>39</sup>. A focus on sustainable management will therefore reduce the climate risk that both fleets and  
201 regions are exposed to.

202 Diversification of the sector is a second key tool to reduce climate risk. Fishing fleets and regions relying  
203 on only a few species have an elevated risk of climate impacts: increasing this spread reduces exposure and  
204 therefore buffers fleets and communities against climate risk<sup>31,40,41</sup>. Diversification of catches and landings  
205 can take place autonomously as fishers respond to changes in the abundance and distribution of the fish  
206 they depend on<sup>32,37</sup>. For example, changes in the distribution of fish species in surrounding waters<sup>42–44</sup> have  
207 led to the development of new fisheries in the UK for squid, seabass and red mullet, amongst others<sup>45</sup>. There  
208 are, however, barriers to diversification<sup>31,41</sup>, most notably in the form of the variety of resources available:  
209 the limited catch diversity and therefore high exposure of fleets and regions adjoining the Black Sea, for  
210 example, arises at least in part from the relatively low biodiversity of this region. The ability to diversify  
211 may also be limited by existing quota agreements<sup>46</sup>, a particularly challenging issue under the “relative  
212 stability” agreements of the EU Common Fisheries Policy.

213 Thirdly, governance can coordinate and drive actions to reduce the vulnerability of fleets and regions.  
214 Investments and support for developing new, and switching between, fishing, storage, transport and  
215 processing technologies can increase the efficiency of fleet operations and, therefore, reduce  
216 vulnerability<sup>18,37,47</sup>. Increasing regional development, including employment opportunities outside the  
217 fisheries sector, reduces regional vulnerability and risk<sup>6,48</sup>. Furthermore, both fishing fleets and regions can  
218 also potentially benefit from governance-led actions that increase the flexibility, ability to learn, social  
219 organisation and the power and freedom to respond to challenges<sup>49</sup>. Regional, national and European  
220 governments therefore have a critical role to play in adapting fisheries and ocean-dependent regions to the  
221 risks presented by climate change.

222 Several key caveats of these results need to be highlighted. Our analysis focused solely on the sensitivity  
223 to ocean warming, ignoring other climate-driven processes, such as ocean acidification, deoxygenation, and  
224 changes in storms or circulation patterns<sup>5,30</sup> that, while important, are viewed as second order effects. Spatial  
225 differences in warming across European regional seas were also not accounted for here but these differences  
226 (1 to 2°C by 2050) are much less than the variability in thermal safety margins between populations (range  
227 15°C). The treatment of uncertainty in CVAs and CRAs varies greatly between studies<sup>15,50</sup> but in such a  
228 semi-quantitative analysis the choice of metrics is usually the most important aspect<sup>51</sup>. We believe that such  
229 “structural uncertainty”<sup>52</sup> is best addressed by focusing on a limited, but transparent and readily  
230 interpretable set of indicators, rather than by quantifying uncertainties or increasing complexity. Finally,  
231 while we have considered European fisheries on fish stocks in the Mediterranean Sea, we have not  
232 incorporated coastal communities in African countries that also fish on these same stocks. The relatively  
233 low GDP per capita of these communities suggests that they would have correspondingly high regional  
234 vulnerabilities and therefore climate risks but it is not possible to draw robust conclusions in the absence of  
235 appropriate data sets: the population-level hazards generated here (Table S7) could be readily applied to  
236 aid such analyses in the future.

237 This study has shown that even though climate-risk to European countries is, on average, moderate  
238 compared to many other countries across the globe<sup>6,21</sup>, major differences exist across the European region.  
239 This is not only true for coastal regions, where especially south-east European and various UK coastal  
240 regions were found to be subject to the greatest climate-risk, but also for the different European fishing  
241 fleets, with (small-sized) fleet segments in south-east Europe at greatest risk. This corroborates with fine-  
242 scale spatial differences among fishing communities documented in eastern North America<sup>13,53</sup> and the  
243 Caribbean<sup>30,54</sup>, each requiring very different adaptation actions. Our detailed analyses allow a distinction  
244 between climate hazard, exposure and vulnerability as key sources of climate-risk, and highlight where  
245 (and which) adaptation measures can have greatest impact in increasing resilience.

## 246 **Acknowledgements**

247 This project received funding from the European Union's Horizon 2020 research and innovation  
248 programme under grant agreement No 678193 (CERES – Climate change and European Aquatic  
249 Resources). The results generated by this analysis can be explored using an online tool available at  
250 [https://markpayne.shinyapps.io/CERES\\_climate\\_risk/](https://markpayne.shinyapps.io/CERES_climate_risk/) Source code is available at  
251 [https://github.com/markpayneatwork/CERES\\_vulnerability](https://github.com/markpayneatwork/CERES_vulnerability). "Fishing Boat", "Urban" and "Thermometer"  
252 icons in Figure 4 by smalllikeart from [www.flaticon.com](http://www.flaticon.com).

## 253 Methods

### 254 General approach

255 We have applied an integrated approach to a climate risk assessment (CRA) across the European fisheries  
256 sector. The CRA has three major components (Figure 4; Figure S2). The first and most fundamental of  
257 these is the *population hazard* component, where the hazard associated with climate-change impacts on  
258 both species and individual fish populations is quantified. We then use these hazard metrics as inputs into  
259 two parallel climate-risk assessments focussing on coastal regions and fishing fleets in turn. In each of these  
260 cases, the population hazard is integrated up to the region or fleet level based on information about the  
261 relative importance of each fish population to that unit, to form the region- or fleet-specific hazards. These  
262 hazard data are then complemented with region- and fleet-focused *exposure* and *vulnerability* metrics to  
263 produce a *climate-risk* for each.

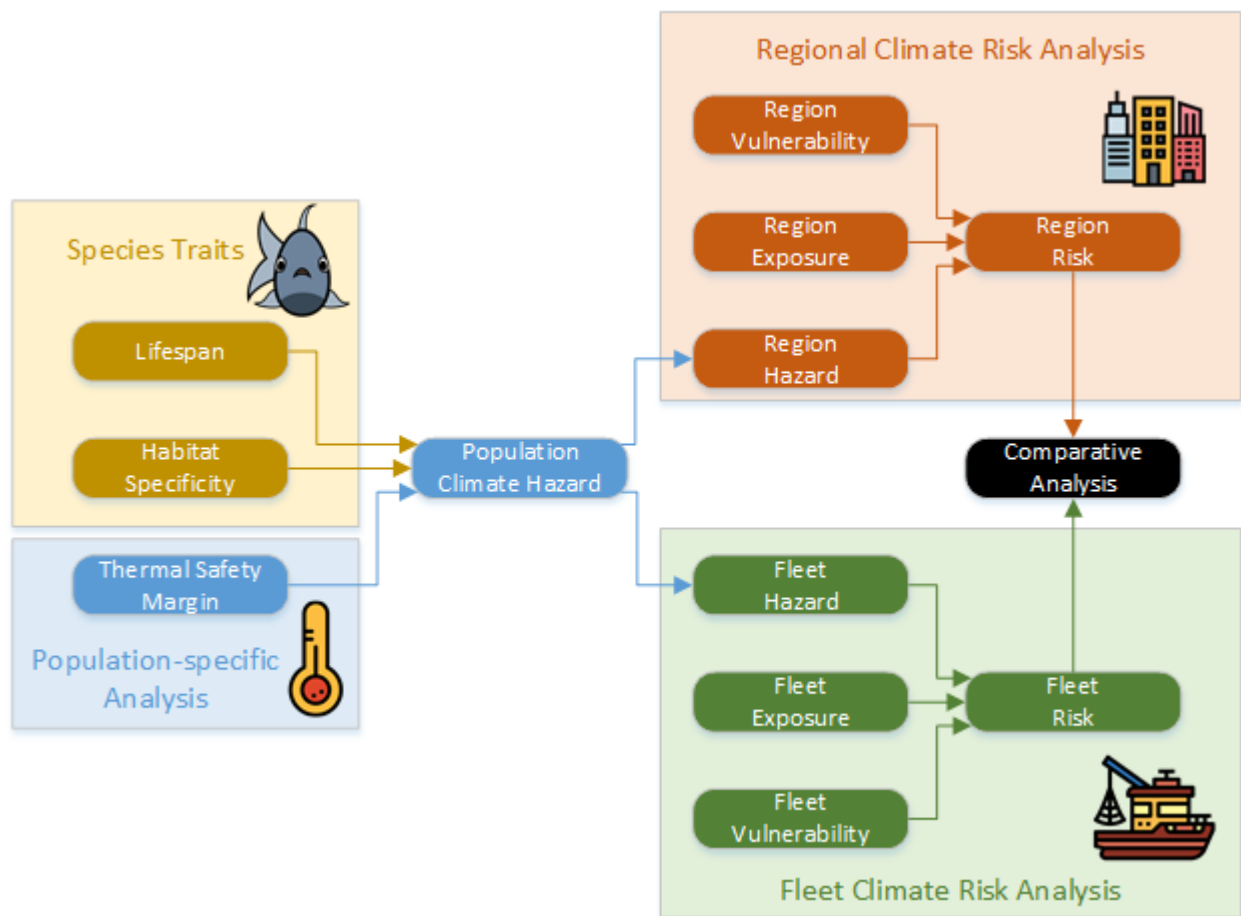

264

265 **Figure 4 Schematic diagram** illustrating the approach used here to estimate climate risk in European fishery-dependent  
266 communities and fishing fleets. Species traits and population specific analyses of the thermal safety margin are combined to give  
267 a population-specific climate hazard. This hazard then forms the basis for the regional and fleet level CRAs, based on the  
268 combination of hazard, exposure and vulnerability. Finally, the regional and fleet risks are combined again into a comparative  
269 analysis. A detailed flow diagram is presented in the supplementary material (Figure S2).

## 270 **Scope and Data Sources**

271 We aimed to assess the climate risk for the European marine fisheries sector, including all 22 EU countries  
272 with marine borders, the United Kingdom, Norway, Iceland and Turkey. We based our analysis primarily  
273 on catch data from FAO Areas 21, 27, 34 and 37 held in the EUROSTAT database (Table S1), excluding  
274 distant water fleets. While this database covers more than 1200 species, many of these are economically  
275 minor. We therefore aimed to cover the largest 90% of the value of the marine fish and shellfish sector in  
276 each country and across Europe as a whole. Two species predominately inhabiting freshwater, European  
277 perch (*Perca fluviatilis*) and pike-perch (*Sander lucioperca*), were removed from the database. Alternative  
278 (or misspelled) scientific names were corrected where we could identify these (following World Register  
279 of Marine Species, WoRMS) (Table S3).

280 Regional analyses were performed for European coastal regions based on NUTS2 statistical units. Sub-  
281 national indicators of landings composition were derived from monthly harbour-level “first-sales” data  
282 from the EU Market Observatory for Fisheries and Aquaculture (EUMOFA) (Table S1). In cases where  
283 this data covered more than one NUTS2 unit within a country (10 countries), the harbour data was  
284 aggregated up to NUTS2 units based on the geographical coordinates of the harbours. Where EUMOFA  
285 data coverage was insufficient, the coastal NUTS2 units of that country were merged into one “region”  
286 (Table S5) and EUROSTAT national landings data were assigned to it (Table S1). Socio-economic data for  
287 the NUTS2 units was also obtained from EUROSTAT and integrated up to our “regions”, if relevant.

288 The Annual Economic Report (AER) provided by the EU Scientific, Technical and Economic Committee  
289 for Fisheries (STECF)<sup>23</sup> formed the basis of the fishing fleet analysis (Table S1). This dataset has the  
290 advantage of providing a single coherent dataset for fleet segments (the combination of fishing technique  
291 and a vessel length category) across all of the European Union and United Kingdom: however, it does not  
292 include data on fleets from Norway, Iceland or Turkey, and in the absence of comparable datasets, these  
293 countries were not included in this part of the analysis.

294 All data was averaged over the period 2010-2018, where available.

## 295 **Hazard Metrics**

296 The *hazard* dimension of our CRA measures the strength and severity of climate change on the unit of  
297 interest: in this case, fish populations in European waters. Many previous CVAs and CRAs do not  
298 distinguish between the positive and negative effects of climate change, and simply highlight elements of  
299 their study system that will change, making interpretation difficult. In contrast, we made a conscious  
300 decision to focus on “negative” impacts in order to have an unambiguous interpretation. We consider the  
301 hazard due to climate change impacts on living marine resources as being the combination of both species-  
302 specific and population-specific processes, as follows.

### 303 **Species-specific processes**

304 A trait-based approach was employed to characterise the hazard of a species to climate change. Such an  
305 approach is well established in climate-risk and vulnerability analyses<sup>15,17,28</sup>, due to its ability to draw on  
306 general understanding of the response of species to climate change. Trait data was collated from previously  
307 published databases<sup>55-58</sup> and complemented with data from Fishbase<sup>59</sup> and Sealifebase<sup>60</sup> (accessed April-  
308 July 2019) (Table S1). Of the original set of species from EUROSTAT, 24 taxa were only at the genus  
309 level, and appropriate trait sets were therefore identified based on ‘exemplar species’: in some cases  
310 different exemplar species were used for the North Atlantic (FAO Area 27) and Mediterranean regions

311 (FAO Area 37) (Table S2). Barnacles (*Pollicipes pollicipes*) and solen razor clams (*Solen* spp.) were also  
 312 removed owing to a lack of biological traits data and difficulties identifying suitable exemplar species.

313 Trait selection aimed to avoid double-counting information due to inclusion of correlated traits, a commonly  
 314 overlooked issue<sup>56</sup> that impacts many published analyses<sup>15,28,29,33</sup>. For example, smaller fish are typically  
 315 planktivorous, live shorter and grow faster, giving a high correlation between maximum length, lifespan,  
 316 growth rates and trophic level. Lifespan is the most commonly available of these metrics and was therefore  
 317 chosen as an exemplar for this set of traits. Shorter lifespans are associated with seasonal and variable  
 318 environments<sup>56</sup>, implying robustness to change and variability, paralleling the approach used in other  
 319 studies<sup>15,28,29,33</sup>.

320 A “habitat specificity” hazard metric was also developed. Species with spatially restricted habitat  
 321 requirements during part or all of their life-history are recognised as being more sensitive to disruption<sup>61,62</sup>.  
 322 In addition, mobile species have the ability to move rapidly to avoid unfavourable conditions in a way that  
 323 sedentary species do not, and are therefore at less climate risk<sup>30</sup>. Traits defining the mobility, and vertical  
 324 and horizontal habitats were therefore collated into a single “habitat-specificity score” (Table 1). The final  
 325 set of traits is included as supplementary material (Table S6).

326 **Table 1 Combination of mobility, vertical and horizontal habitat traits to generate a habitat specificity score.** Definitions of  
 327 traits follow the scheme of Engelhard *et al*<sup>55</sup>.

| <i>Habitat Score</i> | <i>Mobility</i>                    | <i>Vertical habitat</i>                            | <i>Horizontal habitat</i>     |
|----------------------|------------------------------------|----------------------------------------------------|-------------------------------|
| Low (0.00)           | Highly migratory species           | Any                                                | Any                           |
|                      | Mobile                             | Any                                                | Oceanic                       |
|                      | Mobile                             | Bathymedersal<br>Mesopelagic                       | Slope                         |
| Medium (0.33)        | Mobile<br>Unknown                  | Benthopelagic<br>Demersal<br>Pelagic<br>Epipelagic | Slope<br>Shelf<br>Outer shelf |
|                      | Unknown                            | Bathymedersal                                      | Slope                         |
|                      | Mobile                             | Bathymedersal                                      | Outer shelf                   |
| High (0.67)          | Mobile<br>(catadromous/anadromous) | Pelagic                                            | Any                           |
|                      | Mobile                             | Demersal                                           | Inner shelf                   |
|                      | Mobile                             | Benthopelagic                                      | Coastal                       |
| Very high (1.00)     | Sedentary                          | Any                                                | Any                           |
|                      | Mobile                             | Reef-associated                                    | Any                           |

328

### 329 **Population-specific processes**

330 The stress a fish population experiences as the ocean warms depends on the amount of warming, a  
 331 commonly employed metric of exposure in CVAs<sup>6,15</sup>. However, the physiological context of this warming  
 332 is also critical but often overlooked. For example, cod (*Gadus morhua*) in the North Sea are close to their  
 333 upper thermal limit, and will therefore experience negative impacts of warming, while cod in the Barents  
 334 Sea are far from this limit and will experience little or no negative effects of the same amount of warming<sup>63</sup>.  
 335 Such a spatial and physiological context of warming is often overlooked in many CRAs and CVAs, yet is  
 336 critical to differentiate the climate hazard between different populations of the same species.

337 We resolve this problem in two ways. We first perform our analysis at the “population” level, defined as  
338 the combination of species and FAO subarea e.g., cod in subarea 27.4 (North Sea), similar to the approach  
339 used to manage many European fish stocks: populations comprising less than 5% of the total catch of the  
340 species were excluded from the analysis. Note that we explicitly avoid the use of the term “stock” to refer  
341 to this unit of analysis, as this has clear implications in fisheries management but is not entirely the same  
342 as our definition “population”. Secondly, we place the degree of warming experienced by these populations  
343 in a physiological context using thermal-safety margins (TSM)<sup>26,27,64,65</sup>. TSM is defined as the difference  
344 between the maximum temperature that the species can sustain and the temperature of the environment:  
345 high TSMs indicate a high capacity to tolerate warming. Population-specific TSMs therefore permit a fine-  
346 grained measure of the hazard from warming.

347 We derived population-specific TSM metrics from the habitat models, parameters and maps provided by  
348 Aquamaps [www.aquamaps.org](http://www.aquamaps.org)<sup>66</sup> (Table S1). We downloaded “native distribution maps” from the  
349 Aquamaps website for the species selected above: where multiple maps were available, choice was guided  
350 by the internal map quality ranking system. For the invasive species purple whelk (*Rapana venosa*),  
351 originally from waters around Japan, Korea and China but now supporting a large fishery in the Black Sea,  
352 the “Suitable Habitat map” was used. From each map we used the “90<sup>th</sup> percentile” parameter for the  
353 temperature response for each species as an estimate of its upper thermal tolerance. Temperatures in a  
354 subarea were based on the data underpinning the Aquamaps model (NOAA NCEP Climatology, 1982-  
355 1999)<sup>66</sup>, ensuring congruence between the tolerance parameters and the temperature data. Sea-surface or -  
356 bottom temperature data, as appropriate for the species and used in the Aquamap, were masked using the  
357 habitat model to eliminate unsuitable habitat for each individual species (Figure 5). Population-specific  
358 TSM was then calculated as the median difference between the species’ “90<sup>th</sup> percentile” parameter and  
359 temperature across all valid pixels in that subarea.

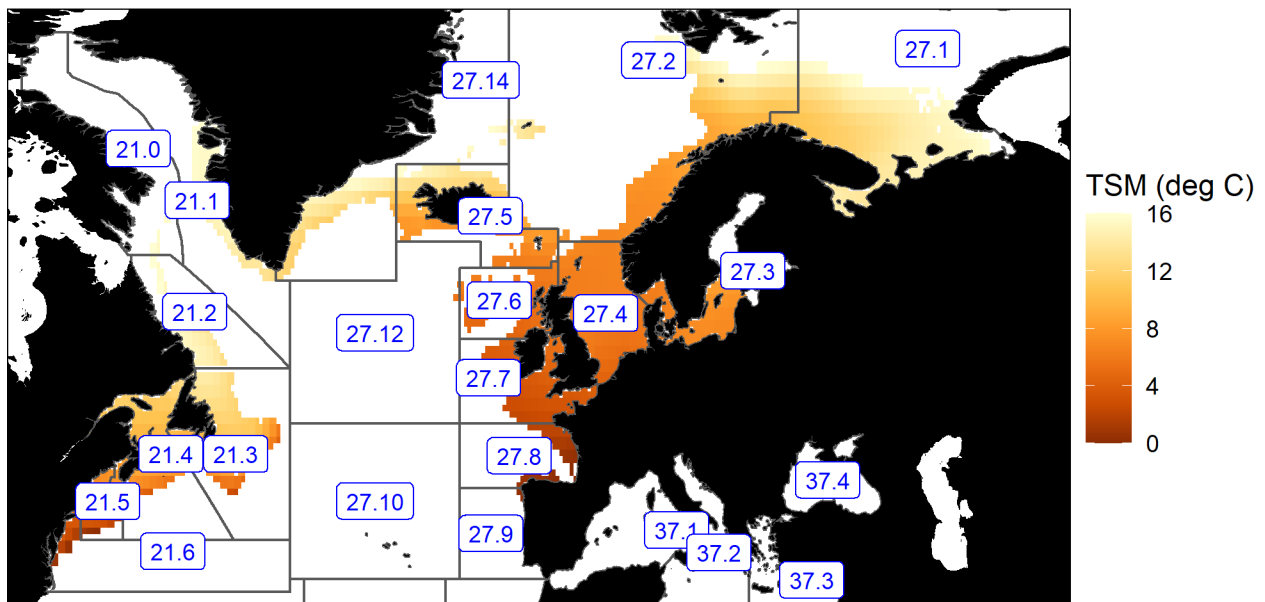

360

361 **Figure 5 Example of the use of Aquamaps to calculate TSM metrics.** Atlantic cod (*Gadus morhua*) as an example.  
362 Environmental data and species thermal tolerance data from Aquamaps are used to calculate the thermal safety margin (TSM) for  
363 this species (coloured pixels) and masked using the habitat model to limit data to modelled regions of occurrence. Median TSM  
364 values are then calculated within each FAO subarea defining a population (grey polygons, blue labels).



## 365 **Population-level hazard**

366 Hazard metrics were combined based on their relative ranking for each population. The metrics employed  
367 here have little quantitative meaning: rather, it is their relative values that are important. Each metric was  
368 therefore converted to a rank percentile, and then combined using a weighted average, with a weight of 0.5  
369 for the population TSM (high TSMs give a low hazard), 0.25 for the species' lifespan (shorter-lifespans  
370 give a low hazard) and 0.25 for the species' habitat-specificity (low specificity gives a low hazard).

371 Population-level hazard scores were integrated up to fishing fleet and regional levels. In the case of the fleet  
372 analysis, this was based on the relative composition (by value) of the populations that each fleet fishes on,  
373 while in the case of the regional analysis it was based on the composition (by value) of landings in that  
374 region (Figure 4, Figure S2).

## 375 **Exposure metrics**

376 We define *exposure* as an indicator of how sensitive a community or fishing fleet is to changes in the fish  
377 populations it is dependent on. Fleets or fishing communities have lower exposure (higher resilience) if  
378 they catch a wide range of different fish species, rather than concentrating on a specific resource<sup>30,31,41</sup>. If  
379 one species is reduced or lost due to the effects of climate change, the impact of that loss is relatively less  
380 severe for fleets and communities that are dependent on a broad portfolio of species. We therefore defined  
381 our exposure metrics following this logic, using two different metrics to characterise diversity of catch or  
382 landings: i) the Shannon diversity index, one of the most commonly used diversity indices in ecology and  
383 ii) Simpson's dominance index, a statistic that emphasizes the relative abundance of the most common  
384 species in the sample<sup>30</sup>.

385 For European regions, exposure metrics were based on the value of landings data from EUMOFA and  
386 EUROSTAT (Table S1; Figure S2). While EUROSTAT data is species resolved, EUMOFA data is  
387 organised in approximately 100 "main commercial species" (MCS) groupings: we therefore harmonised  
388 the two datasets by aggregating EUROSTAT data to the MCS groupings based on correlation keys provided  
389 by EUMOFA. The Shannon and Simpson metrics were then calculated to estimate the diversity of MCS  
390 groups.

391 For fleet segments, the value of landings is available by species code from the STECF Annual Economic  
392 Report<sup>23</sup>. The two diversity indices could therefore be calculated directly to quantify the diversity of species.

393 In both cases, the exposure index was produced as a composite index of the two indices described above  
394 by averaging the percentile ranks.

## 395 **Vulnerability metrics**

396 *Vulnerability* in this setting refers to the resilience of the analysis unit (either a region or a fleet) and its  
397 ability to mitigate the hazard via adaptation.

398 The regional vulnerability metric was based on the gross-domestic product per capita of the region, as  
399 calculated from EUROSTAT data at the NUTS2 level (Table S1). Regions with high GDP per capita were  
400 viewed as having a high adaptive capacity and therefore low vulnerability. Regional vulnerability was  
401 calculated as the percentile rank of this statistic.

402 Fleet segment vulnerability was based on the net profit margin (NPM). This is a standard economic metric,  
403 defined as net profit (i.e. revenue minus fixed and variable costs and opportunity cost) divided by the total  
404 revenue: it therefore represents how much of the total income generated by the fleet is profit<sup>23</sup>. NPM has  
405 the feature of taking into account many of the different factors that influence the profitability of the fleet,



406 and is also scale independent (as profitability is divided by the revenue), allowing comparison of both large  
407 and small segments. NPM was calculated for each fleet segment based on economic data from the STECF  
408 Annual Economic Report<sup>23</sup> (Table S1), and the vulnerability score generated based on percentile rank. Fleet  
409 segments with high profitability were viewed as being less vulnerable to the effects of climate change, as  
410 they could absorb the anticipated loss associated with any potential negative change in their target species.

#### 411 **Climate risk metrics**

412 For each of the geographic regions, and for each of the fleet segments, the overall *climate risk* was  
413 calculated as the unweighted mean of the hazard, exposure and vulnerability percentile ranks.

## 414 References

- 415 1. Hassan, R. M., Scholes, R. & Ash, N. Ecosystems and Human Well-being - Current State and  
416 Trends: Findings of the Condition and Trends Working Group of the Millennium Ecosystem  
417 Assessment. *Millenn. Ecosyst. Assess. Ser. (v. 1)* xxi, 917 (2005). doi:10.1016/j.fm.2010.10.016
- 418 2. Poloczanska, E. S. *et al.* Global imprint of climate change on marine life. *Nat. Clim. Chang.* **3**, 919–  
419 925 (2013).
- 420 3. Phillips, B. & Pérez-Ramírez, M. *Climate Change Impacts on Fisheries and Aquaculture: A Global*  
421 *Analysis*. (John Wiley and Sons Inc., 2018).
- 422 4. FAO. *Impacts of climate change on fisheries and aquaculture*. (2018).
- 423 5. IPCC. *IPCC Special Report on the Ocean and Cryosphere in a Changing Climate*. (2019).  
424 doi:<https://www.ipcc.ch/report/srocc/>
- 425 6. Allison, E. H. *et al.* Vulnerability of national economies to the impacts of climate change on  
426 fisheries. *Fish Fish.* **10**, 173–196 (2009).
- 427 7. Johnson, J. E. *et al.* Assessing and reducing vulnerability to climate change: Moving from theory to  
428 practical decision-support. *Mar. Policy* **74**, 220–229 (2016).
- 429 8. Oppenheimer, M. *et al.* Emergent risks and key vulnerabilities. in *Climate Change 2014: Impacts,*  
430 *Adaptation, and Vulnerability. Part A: Global and Sectoral Aspects. Contribution of Working Group*  
431 *II to the Fifth Assessment Report of the Intergovernmental Panel on Climate Change* (eds. Field, C.  
432 et al.) 1039–1099 (Cambridge University Press, 2014).
- 433 9. Connelly, A., Carter, J., Handley, J. & Hincks, S. Enhancing the practical utility of risk assessments  
434 in climate change adaptation. *Sustain.* **10**, 1–12 (2018).
- 435 10. Cardona, O. D. *et al.* Determinants of risk: Exposure and vulnerability. in *Managing the Risks of*  
436 *Extreme Events and Disasters to Advance Climate Change Adaptation: A Special Report of Working*  
437 *Groups I and II of the Intergovernmental Panel on Climate Change (IPCC)*. (eds. Field, C. B. et al.)  
438 65–108 (Cambridge University Press, 2012). doi:10.1017/CBO9781139177245.005
- 439 11. Neil Adger, W. Social Vulnerability to Climate Change and Extremes in Coastal Vietnam. *World*  
440 *Dev.* **27**, 249–269 (1999).
- 441 12. Cinner, J. E. *et al.* Evaluating Social and Ecological Vulnerability of Coral Reef Fisheries to Climate  
442 Change. *PLoS One* **8**, e74321 (2013).
- 443 13. Colburn, L. L. *et al.* Indicators of climate change and social vulnerability in fishing dependent  
444 communities along the Eastern and Gulf Coasts of the United States. *Mar. Policy* **74**, 323–333  
445 (2016).
- 446 14. Ekstrom, J. A. *et al.* Vulnerability and adaptation of US shellfisheries to ocean acidification. *Nat.*  
447 *Clim. Chang.* **5**, 207–214 (2015).
- 448 15. Hare, J. A. *et al.* A Vulnerability Assessment of Fish and Invertebrates to Climate Change on the  
449 Northeast U.S. Continental Shelf. *PLoS One* **11**, e0146756 (2016).
- 450 16. Fulton, E. A. *et al.* *Decadal scale projection of changes in Australian fisheries stocks under climate*  
451 *change*. (CSIRO, Australia, 2017).
- 452 17. Pecl, G. T. *et al.* Rapid assessment of fisheries species sensitivity to climate change. *Clim. Change*

- 453           **127**, 505–520 (2014).
- 454   18.   Bell, J. D., Johnson, J. E. & Hobday, A. J. *Vulnerability of tropical pacific fisheries and aquaculture*  
455       *to climate change*. (Secretariat of the Pacific Community, 2011).
- 456   19.   Barsley, W., De Young, C. & Brugere, C. Vulnerability assessment methodologies: an annotated  
457       bibliography for climate change and the fisheries and aquaculture sector. *FAO Fish. Aquac. Circ.*  
458       *No. 1083* (2013).
- 459   20.   Barange, M. *et al.* Impacts of climate change on marine ecosystem production in societies dependent  
460       on fisheries. *Nat. Clim. Chang.* **4**, 211–216 (2014).
- 461   21.   Blasiak, R. *et al.* Climate change and marine fisheries: Least developed countries top global index  
462       of vulnerability. *PLoS One* **12**, 1–15 (2017).
- 463   22.   Brugere, C. & De Young, C. *Assessing climate change vulnerability in fisheries and aquaculture*  
464       *Available methodologies and their relevance for the sector*. (FAO Fisheries and Aquaculture  
465       Technical Paper 597. FAO, 2015).
- 466   23.   STECF. *The 2018 Annual Economic Report on the EU Fishing Fleet (STECF 18-07)*. Publications  
467       Office of the European Union (Publications Office of the European Union, 2018).  
468       doi:10.2760/56158
- 469   24.   Peck, M. A. & Pinnegar, J. K. Chapter 5: Climate change impacts, vulnerabilities and adaptations:  
470       North Atlantic and Atlantic Arctic marine fisheries. in *Impacts of Climate Change on Fisheries and*  
471       *Aquaculture: Synthesis of current knowledge, adaptation and mitigation options*. 87–111 (FAO  
472       Fisheries and Aquaculture Technical Paper No. 627. FAO, 2018).
- 473   25.   Natale, F., Carvalho, N., Harrop, M., Guillen, J. & Frangoudes, K. Identifying fisheries dependent  
474       communities in EU coastal areas. *Mar. Policy* **42**, 245–252 (2013).
- 475   26.   Deutsch, C. A. *et al.* Impacts of climate warming on terrestrial ectotherms across latitude. *Proc.*  
476       *Natl. Acad. Sci.* **105**, 6668–6672 (2008).
- 477   27.   Sunday, J. M. *et al.* Thermal-safety margins and the necessity of thermoregulatory behavior across  
478       latitude and elevation. *Proc. Natl. Acad. Sci. U. S. A.* **111**, 5610–5615 (2014).
- 479   28.   Jones, M. C. & Cheung, W. W. L. Using fuzzy logic to determine the vulnerability of marine species  
480       to climate change. *Glob. Chang. Biol.* **24**, e719–e731 (2018).
- 481   29.   Cheung, W. W. L., Pitcher, T. J. & Pauly, D. A fuzzy logic expert system to estimate intrinsic  
482       extinction vulnerabilities of marine fishes to fishing. *Biol. Conserv.* **124**, 97–111 (2005).
- 483   30.   Pinnegar, J. K., Engelhard, G. H., Norris, N. J., Theophille, D. & Sebastien, R. D. Assessing  
484       vulnerability and adaptive capacity of the fisheries sector in Dominica: long-term climate change  
485       and catastrophic hurricanes. *ICES J. Mar. Sci.* **76**, 1353–1367 (2019).
- 486   31.   Cline, T. J., Schindler, D. E. & Hilborn, R. Fisheries portfolio diversification and turnover buffer  
487       Alaskan fishing communities from abrupt resource and market changes. *Nat. Commun.* **8**, 1–7  
488       (2017).
- 489   32.   Lindegren, M. & Brander, K. Adapting Fisheries and Their Management To Climate Change: A  
490       Review of Concepts, Tools, Frameworks, and Current Progress Toward Implementation. *Rev. Fish.*  
491       *Sci. Aquac.* **26**, 400–415 (2018).
- 492   33.   Cheung, W. W. L., Jones, M. C., Reygondeau, G. & Frölicher, T. L. Opportunities for climate-risk  
493       reduction through effective fisheries management. *Glob. Chang. Biol.* **24**, 5149–5163 (2018).

- 494 34. Drinkwater, K. F. *et al.* On the processes linking climate to ecosystem changes. *J. Mar. Syst.* **79**,  
495 374–388 (2010).
- 496 35. Planque, B. *et al.* How does fishing alter marine populations and ecosystems sensitivity to climate?  
497 *J. Mar. Syst.* **79**, 403–417 (2010).
- 498 36. Bell, J. D. *et al.* Effects of climate change on oceanic fisheries in the tropical Pacific: implications  
499 for economic development and food security. *Clim. Change* **119**, 199–212 (2013).
- 500 37. Pinsky, M. L. & Mantua, N. Emerging Adaptation Approaches for Climate-Ready Fisheries  
501 Management. *Oceanography* **27**, 146–159 (2014).
- 502 38. Payne, M. R. *et al.* Lessons from the First Generation of Marine Ecological Forecast Products. *Front.*  
503 *Mar. Sci.* **4**, (2017).
- 504 39. Hobday, A. J. *et al.* A Framework for Combining Seasonal Forecasts and Climate Projections to Aid  
505 Risk Management for Fisheries and Aquaculture. *Front. Mar. Sci.* **5**, 1–9 (2018).
- 506 40. Pinsky, M. L. *et al.* Fish and fisheries in hot water: What is happening and how do we adapt? *Popul.*  
507 *Ecol.* (2020). doi:10.1002/1438-390X.12050
- 508 41. Young, T. *et al.* Adaptation strategies of coastal fishing communities as species shift poleward. *ICES*  
509 *J. Mar. Sci.* **76**, 93–103 (2019).
- 510 42. Perry, A. L. Climate Change and Distribution Shifts in Marine Fishes. *Science (80-. )*. **308**, 1912–  
511 1915 (2005).
- 512 43. Simpson, S. D. *et al.* Continental shelf-wide response of a fish assemblage to rapid warming of the  
513 sea. *Curr. Biol.* **21**, 1565–70 (2011).
- 514 44. Baudron, A. R. *et al.* Changing fish distributions challenge the effective management of European  
515 fisheries. *Ecography (Cop.)*. **43**, 494–505 (2020).
- 516 45. Pinnegar, J. K., Wright, P. J., Maltby, K. & Garrett, A. The impacts of climate change on fisheries,  
517 relevant to the coastal and marine environment around the UK. *MCCIP Sci. Rev.* **2020** 456–481  
518 (2020). doi:10.14465/2020.arc20.fis
- 519 46. Pinsky, M. L. *et al.* Preparing ocean governance for species on the move. *Science (80-. )*. **360**, 1189–  
520 1191 (2018).
- 521 47. McIlgorm, A. *et al.* How will climate change alter fishery governance? Insights from seven  
522 international case studies. *Mar. Policy* **34**, 170–177 (2010).
- 523 48. Badjeck, M. C., Allison, E. H., Halls, A. S. & Dulvy, N. K. Impacts of climate variability and change  
524 on fishery-based livelihoods. *Mar. Policy* **34**, 375–383 (2010).
- 525 49. Cinner, J. E. *et al.* Building adaptive capacity to climate change in tropical coastal communities.  
526 *Nat. Clim. Chang.* **8**, (2018).
- 527 50. Spencer, P. D., Hollowed, A. B., Sigler, M. F., Hermann, A. J. & Nelson, M. W. Trait-based climate  
528 vulnerability assessments in data-rich systems: An application to eastern Bering Sea fish and  
529 invertebrate stocks. *Glob. Chang. Biol.* **25**, 3954–3971 (2019).
- 530 51. Monnereau, I. *et al.* The impact of methodological choices on the outcome of national-level climate  
531 change vulnerability assessments: An example from the global fisheries sector. *Fish Fish.* **18**, 717–  
532 731 (2017).

- 533 52. Payne, M. R. *et al.* Uncertainties in projecting climate-change impacts in marine ecosystems. *ICES*  
534 *J. Mar. Sci.* **73**, 1272–1282 (2016).
- 535 53. Rogers, L. A. *et al.* Shifting habitats expose fishing communities to risk under climate change. *Nat.*  
536 *Clim. Chang.* **9**, 512–516 (2019).
- 537 54. Monnereau, I. *et al.* *Vulnerability of the fisheries sector to climate change impacts in Small Island*  
538 *Developing States and the Wider Caribbean*. (CERMES Technical Report No77. University of the  
539 West Indies. Barbados, 2015).
- 540 55. Engelhard, G. H., Ellis, J. R., Payne, M. R., ter Hofstede, R. & Pinnegar, J. K. Ecotypes as a concept  
541 for exploring responses to climate change in fish assemblages. *ICES J. Mar. Sci.* **68**, 580–591 (2011).
- 542 56. Pecuchet, L. *et al.* From traits to life-history strategies: Deconstructing fish community composition  
543 across European seas. *Glob. Ecol. Biogeogr.* **26**, 812–822 (2017).
- 544 57. Beukhof, E. *et al.* Marine fish traits follow fast-slow continuum across oceans. *Sci. Rep.* **9**, 17878  
545 (2019).
- 546 58. Beukhof, E., Dencker, T. S., Palomares, M. L. D. & Maureaud, A. A trait collection of marine fish  
547 species from North Atlantic and Northeast Pacific continental shelf seas. *Pangaea* 1–12 (2019).  
548 doi:10.1594/PANGAEA.900866
- 549 59. Froese, R. & Pauly, D. Fishbase. (2019). Available at: [www.fishbase.org](http://www.fishbase.org).
- 550 60. Palomares, M. L. D. & Pauly, D. Sealifebase. (2019). Available at: <https://www.sealifebase.ca/>.
- 551 61. Petitgas, P. *et al.* Impacts of climate change on the complex life cycles of fish. *Fish. Oceanogr.* **22**,  
552 121–139 (2013).
- 553 62. Rijnsdorp, A. D., Peck, M. A., Engelhard, G. H., Mo, C. & Pinnegar, J. K. Resolving the effect of  
554 climate change on fish populations. *ICES J. Mar. Sci.* **66**, 1570–1583 (2009).
- 555 63. Drinkwater, K. F. The response of Atlantic cod (*Gadus morhua*) to future climate change. *ICES J.*  
556 *Mar. Sci.* **62**, 1327–1337 (2005).
- 557 64. Dahlke, F. T., Wohlrab, S., Butzin, M. & Pörtner, H.-O. Thermal bottlenecks in the life cycle define  
558 climate vulnerability of fish. *Science (80-. )*. **369**, 65–70 (2020).
- 559 65. Pinsky, M. L., Eikeset, A. M., McCauley, D. J., Payne, J. L. & Sunday, J. M. Greater vulnerability  
560 to warming of marine versus terrestrial ectotherms. *Nature* (2019). doi:10.1038/s41586-019-1132-  
561 4
- 562 66. Kesner-Reyes, K., K. *et al.* AquaMaps: algorithm and data sources for aquatic organisms. *FishBase.*  
563 *World Wide Web electronic publication* (2012). Available at: [www.fishbase.org](http://www.fishbase.org). (Accessed: 1st May  
564 2020)
- 565
